# Supplementary material for: Pepper variome reveals the history and key loci associated with fruit domestication and diversification
Source: Research Square preprint supplement (doi:10.21203/rs.3.rs-612022/v1), 2021-10-28
Supplement: Supplementary file 2 [file 4db99ad58fd7373005c5974e.xlsx]

## Sheet: S1
Table S1. Summary of the sampled collection of pepper.
Index	Accession name	Origin of institute/genebank	Geographical origin	IVF-CAAS#	NMSU#	PI#	INRAE#	AVRDC#	Species	Resequencing depth (×)	Fruit shape	Group	Average fruit weight /g	Average fruit length /cm	Average fruit width /cm	Capsaicinoids content (mg/kg DW)	Fruit orientation (erect 0, pendent 1)	Comments
1	129-1	INRAE	America				PM1533		C. annuum var. glabriusculum	5.02	Waterdrop	0	0.19918	1.23553	0.483533	1145.87	0
2	Ac1979	WU	Jamaica						C. annuum var. glabriusculum	4.9	Waterdrop	0	0.38	1.225	0.508333	839.001	0
												0 Avg	0.28959	1.23027	0.495933	992.435
												Stdev	0.127859	0.00744819	0.0175362	216.988
3	Unknown	NMSU	Mexico		NMCA10214				C. annuum	9.52	Olivary	I	9.23	5.65	1.96667	1426.49	1
4	Unknown	NMSU	Brazil		NMCA10605				C. annuum	9.08	Olivary	I	14.64	5.4	2.23333	654.824	1
5	Unknown	IVF-CAAS	Shanxi, China	II6C2256					C. annuum	9.26	Olivary	I	34.4403	6.88053	2.84629	0	1
6	Unknown	IVF-CAAS	Unknown	II6C2232					C. annuum	8.23	Olivary	I	19.8619	6.23693	2.52033	157.78	1
7	Jalapeno	IVF-CAAS	Mexico	II6C1430					C. annuum	10.36	Olivary	I	18.5258	5.81793	2.68207	1869.9	1
8	BGV013866	IVF-CAAS	Spain	II6C2319					C. annuum	10.79	Short	I	1.70013	3.48533	0.904867	1400.24	0
9	Unknown	NMSU	Mexico		NMCA10231				C. annuum	11.16	Short	I	2.21	7.56667	0.816667	239.812	1
10	Unknown	NMSU	Mexico		NMCA10215				C. annuum	9.05	Short	I	1.75	3.81667	0.983333	1971.82	0
11	CRIOLLO DE MORELOS 334	INRAE	Mexico				PM0702		C. annuum	4.42	Conical	I	9.26833	6.43333	2.53333	80.6647	1
12	RP4	INRAE	France						C. annuum	4.47	Conical	I	6.285	6.60833	1.79167	-	1
												I Avg	11.7911	5.78957	1.92786	866.837
												Stdev	10.3778	1.2913	0.775795	801.186
13	Chee Feh	IVF-CAAS	Thailand	II6C1404					C. annuum	8.64	Elongate	II	11.8769	9.1202	1.41167	150.948	1
14	Unknown	IVF-CAAS	Thailand	II6C2224					C. annuum	8.32	Elongate	II	12.5862	11.0035	1.67693	82.3604	1
15	Unknown	IVF-CAAS	Germany	II6C2246					C. annuum	8.26	Conical	II	37.4971	9.11407	3.7524	20.3249	1
16	664	IVF-CAAS	India						C. annuum	8.02	Slim	II	8.64167	17.2833	1.31667	163.105	1
17	Co 1664	IVF-CAAS	Denmark	II6C1900					C. annuum	10.46	Short	II	2.9654	7.47172	0.890333	1913.85	1
18	TvRc758	IVF-CAAS	Thailand	II6C2264					C. annuum	8.39	Short	II	2.34207	5.81467	0.986533	3093.21	0
19	Tongan Ximijiao	IVF-CAAS	Fujian, China	II6C0677					C. annuum	10.4	Short	II	2.54513	7.28247	0.767	4112.43	0
20	Unknown	NMSU	Ghana		NMCA11246				C. annuum	8.96	Elongate	II	5.8	9.91667	1.15	512.323	1
21	Unknown	NMSU	South America		NMCA10177				C. annuum	8.88	Short	II	3.51	6.46667	1.38333	1440.04	1
22	PRAGATHI-2	IVF-CAAS	India						C. annuum	9.94	Elongate	II	5.055	10.0833	1.06667	1044.57	1
23	Hungarian landrace pepper		Hungary						C. annuum	10.56	Elongate	II	29.8969	13.875	2.9	0	1
24	Sharp pepper	IVF-CAAS	Tibet, China	II6C1176					C. annuum	10.04	Elongate	II	13.987	10.2861	2.1378	822.777	1
25	African chili	IVF-CAAS	Jilin, China	II6C1566					C. annuum	9.73	Short	II	1.97867	4.8268	0.947867	4713.16	0
26	Unknown	IVF-CAAS	China	II6C2183				PBC142A	C. annuum	9.74	Short	II	1.87847	5.17867	0.846067	5040.78	0
27	PERENNIAL	INRAE	India				PM0659		C. annuum	4.79	Short	II	1.39833	4.2	0.841667	3374.09	0
28	Bisbas	WU	Yemen						C. annuum	4.64	Short	II	3.07	4.23333	1.28333	2296.61	-
29	PI271322	USDA	India			PI 271322	PM0686		C. annuum	11.56	Elongate	II	5.275	9.7	1.15	1591.44	1
30	Unknown	IVF-CAAS	India	II6C2303					C. annuum	10.1	Short	II	2.80347	4.45147	1.173	543.149	1
31	Unknown	IVF-CAAS	Yunnan, China	II6C2298					C. annuum	8.13	Short	II	3.1878	6.81893	0.973067	2658.04	1
32	TE5A	IVF-CAAS	India						C. annuum	9.2	Elongate	II	13.5277	14.1083	1.76667	1438.53	1
33	Purple leaf small pepper	IVF-CAAS	Korea	II6C1883					C. annuum	8.64	Elongate	II	6.28767	7.02107	1.56187	91.9504	1
34	Pod pepper	IVF-CAAS	Shandong, China	II6C1270					C. annuum	9.99	Short	II	2.5652	6.14913	0.8644	-	0
35	Fangcheng pod pepper	IVF-CAAS	Henan, China	II6C1314					C. annuum	9.91	Slim	II	3.50887	8.16867	1.04087	25.4732	0
36	Meng County small pepper	IVF-CAAS	Henan, China	II6C1597					C. annuum	8.67	Short	II	2.81983	6.80325	0.845167	396.922	0
37	Pod pepper	IVF-CAAS	Hubei, China	II6C0985					C. annuum	9.48	Short	II	3.94427	5.82723	1.06567	1951.05	0
38	Suxian pod pepper	IVF-CAAS	Anhui, China	II6C0467					C. annuum	8.71	Short	II	3.41287	8.0614	0.91758	1762.24	0
39	Mengcun pod pepper	IVF-CAAS	Hebei, China	II6C0734					C. annuum	9.47	Conical	II	4.205	5.75073	1.32933	236.043	0
40	9104	IVF-CAAS	Japan	II6C1549					C. annuum	7.58	Short	II	3.19833	6.448	1.00887	-	1
41	Pod pepper	IVF-CAAS	Hebei, China	II6C0376					C. annuum	8.82	Conical	II	1.85093	3.30693	1.22227	3612.21	0
42	Unknown	IVF-CAAS	China	II6C2125					C. annuum	9.37	Short	II	2.84453	5.69887	0.7924	2165.98	0
43	Unknown	NMSU	Argentina		NMCA10982				C. annuum	8.96	Conical	II	2.32	2.25	1.68333	733.295	0
44	Jiangle button pepper	IVF-CAAS	Fujian, China	II6C0739					C. annuum	8.93	Conical	II	2.75687	2.01933	1.97687	1112.18	0
45	Zhongding chili	IVF-CAAS	Guangxi, China	II6C1228					C. annuum	9.95	Elongate	II	14.0147	13.9933	1.69613	80.3475	1
46	Cattle-horn pepper	IVF-CAAS	Guangdong, China	II6C0528					C. annuum	7.66	Elongate	II	17.2499	11.9287	2.19147	36.4932	1
47	Qingyuanyuan peach chili	IVF-CAAS	Guangdong, China	II6C1752					C. annuum	9.4	Elongate	II	13.2266	12.8345	1.71987	220.848	1
48	Goldfish yellow pepper	IVF-CAAS	Guangxi, China	II6C1388					C. annuum	7.76	Short	II	10.8449	5.73333	1.15833	5873.81	1
49	Unknown	IVF-CAAS	China	II6C1899				PBC373	C. annuum	9.8	Elongate	II	12.1134	13.7067	1.58274	365.019	1
50	Unknown	IVF-CAAS	China	II6C2152					C. annuum	10.28	Elongate	II	14.1507	11.7776	1.96007	4.25136	1
51	Slim pepper	IVF-CAAS	Yunnan, China	II6C1555					C. annuum	7.78	Slim	II	6.18207	11.5009	1.09671	991.27	1
52	96-411	IVF-CAAS	Korea	II6C1948					C. annuum	6.35	Short	II	5.21587	6.76907	1.3754	577.857	1
53	Small bell pepper	IVF-CAAS	Liaoning, China	II6C1950					C. annuum	7.7	Conical	II	5.01953	4.84433	1.83953	1986.24	0
54	Tian Ying chill	IVF-CAAS	Hebei, China	II6C2041					C. annuum	10.75	Short	II	2.34427	4.55947	0.852933	1361.73	0
55	Japan three cherry pepper	IVF-CAAS	Japan	II6C2315					C. annuum	10.36	Short	II	2.3159	5.68617	0.837367	1394.44	0
												II Avg	7.26081	7.95521	1.37303	1463.2
												Stdev	7.43803	3.5722	0.594478	1526.18
56	Slim pepper	IVF-CAAS	Hebei, China	II6C0393					C. annuum	4.82	Elongate	III	9.3066	12.6334	1.424	132.72	1
57	Short Cattle-horn	IVF-CAAS	Hubei, China	II6C1735					C. annuum	9.97	Conical	III	20.4529	9.30547	3.1668	7.00769	1
58	Slim pepper	IVF-CAAS	Hubei, China	II6C1669					C. annuum	10.27	Elongate	III	31.2551	10.1699	3.902	151.443	1
59	Early pepper	IVF-CAAS	Hubei, China	II6C1765					C. annuum	9.58	Conical	III	42.0182	11.3903	3.88147	47.8251	1
60	Unknown	IVF-CAAS	Shandong, China	II6C1397					C. annuum	10.56	Elongate	III	28.273	10.9977	3.69483	-	1
61	Qufu bell	IVF-CAAS	Shandong, China	II6C0264					C. annuum	8.57	Conical	III	23.9585	5.716	3.667	354.945	1
62	S.PCA777	IVF-CAAS	Thailand	II6C2181					C. annuum	8.95	Elongate	III	29.8927	9.4702	3.5808	-	1
63	Small Cattle-horn	IVF-CAAS	Sichuan, China	II6C1289					C. annuum	9.87	Conical	III	30.7791	8.35393	3.50493	0	1
64	Tianshui slim pepper	IVF-CAAS	Gansu, China	II6C1771					C. annuum	8.91	Elongate	III	19.2515	14.8905	2.19887	331.425	1
65	Cattlepea pepper	IVF-CAAS	Sichuan, China	II6C1153					C. annuum	8.24	Elongate	III	9.2302	12.6685	1.35613	-	1
66	Sharp pepper	IVF-CAAS	Shanxi, China	II6C0003					C. annuum	12.63	Elongate	III	8.40827	10.3379	1.76051	23.0736	1
67	Taole Cattle-horn pepper	IVF-CAAS	Ningxia, China	II6C1898					C. annuum	8.98	Elongate	III	36.6931	13.2101	3.91187	134.605	1
68	Zhongwei sharp chili	IVF-CAAS	Ningxia, China	II6C1862					C. annuum	10.32	Elongate	III	32.7639	17.4691	2.98293	52.8358	1
69	Linjiang small pepper	IVF-CAAS	Jilin, China	II6C0016					C. annuum	5.42	Elongate	III	9.16327	8.34987	1.80473	296.811	1
70	Red chili	IVF-CAAS	Liaoning, China	II6C0358					C. annuum	7.77	Elongate	III	8.048	9.63707	1.42927	68.4486	1
71	Bell pepper	IVF-CAAS	Hebei, China	II6C0875					C. annuum	8.06	Round	III	7.9018	2.95058	2.58967	224.186	1
72	Half flat top pepper	IVF-CAAS	Hebei, China	II6C0398					C. annuum	7.21	Conical	III	12.0327	5.61573	2.68273	47.2912	1
73	Chicken intestines chili	IVF-CAAS	Hebei, China	II6C1248					C. annuum	10.25	Elongate	III	8.34103	11.8885	1.37827	552.348	1
74	Yidu red pepper	IVF-CAAS	Shandong, China						C. annuum	4.76	Elongate	III	15.5783	11.2583	2.1	314.327	1
75	Unknown	IVF-CAAS	China	II6C1903				PBC266	C. annuum	8.8	Elongate	III	11.0081	9.83393	1.88433	192.194	1
76	Gyeongbuk pepper	IVF-CAAS	Korea	II6C1401					C. annuum	9.69	Elongate	III	7.326	8.47513	1.53307	1318.52	1
77	Unknown	IVF-CAAS	Unknown	II6C2230					C. annuum	6.96	Elongate	III	20.0941	11.5812	2.27833	406.593	1
78	0819	IVF-CAAS	Guangdong, China						C. annuum	9.57	Elongate	III	44.6633	20.2	3.11667	261.662	1
79	Maofeng 0818	IVF-CAAS	Guangdong, China						C. annuum	5.05	Elongate	III	42.045	20.2583	2.89167	15.1273	1
80	Small horns	IVF-CAAS	Gansu, China	II6C0025					C. annuum	6.72	Slim	III	17.0136	15.5073	1.66767	220.758	1
81	Xiansan Pepper	IVF-CAAS	Gansu, China	II6C1122					C. annuum	9.18	Slim	III	16.4651	20.0777	1.47313	455.631	1
82	Whip pepper	IVF-CAAS	Jilin, China	II6C2015					C. annuum	9.81	Slim	III	17.3041	19.7258	1.40773	227.656	1
83	Wanchang pepper	IVF-CAAS	Jilin, China	II6C0206					C. annuum	5.68	Conical	III	8.06873	7.03547	2.4168	49.882	1
84	Small chili	IVF-CAAS	Liaoning, China	II6C0079					C. annuum	8.71	Elongate	III	12.5083	7.0162	2.15633	1943.03	1
85	184	IVF-CAAS	America	II6C1364					C. annuum	8.98	Conical	III	7.68293	5.3356	1.93447	773.605	1
86	Local pepper	IVF-CAAS	Xinjiang, China	II6C1165					C. annuum	7.37	Conical	III	21.5767	7.9178	3.2758	534.379	1
87	Hami goat-horn pepper	IVF-CAAS	Xinjiang, China	II6C1160					C. annuum	9.32	Elongate	III	23.9656	7.94387	3.53687	103.28	1
88	Unknown	IVF-CAAS	Heilongjiang, China	II6C0938					C. annuum	12.06	Elongate	III	18.3391	11.4077	2.4914	277.153	1
89	Chessboard red chili	IVF-CAAS	Jilin, China	II6C0013					C. annuum	4.99	Conical	III	13.835	8.85513	2.68813	290.458	1
90	Lamianzi	IVF-CAAS	Ningxia, China	II6C1232					C. annuum	9.01	Elongate	III	24.7548	13.4963	2.76187	544.825	1
91	Unknown	AVRDC	China					PBC446	C. annuum	4.4	Elongate	III	6.42667	6.36333	1.54	5.02393	0
92	HD330 HD(PM217 x YW)30	INRAE	France				PM1615		C. annuum	4.42	Conical	III	16.995	4.24167	3.65	304.618	1
93	No. Twenty - two	IVF-CAAS	Shanxi, China	II6C0273					C. annuum	7.14	Elongate	III	32.3947	19.1753	2.8438	980.147	1
94	Large bell pepper	IVF-CAAS	Jilin, China	II6C0210					C. annuum	6.65	Conical	III	31.2395	7.20133	4.9695	85.8876	1
												III Avg	19.9245	10.9734	2.60345	325.825
												Stdev	11.0162	4.62108	0.92924	397.726
95	Small leaf pepper	IVF-CAAS	Jiangsu, China	II6C0303					C. annuum	5.99	Blocky	IV	25.5774	6.36847	4.69007	20.2405	1
96	Thin flesh fast pepper	IVF-CAAS	Jilin, China	II6C0212					C. annuum	7.38	Blocky	IV	52.2077	6.22179	6.20653	-	1
97	Bell pepper	IVF-CAAS	Liaoning, China	II6C1542					C. annuum	10.44	Blocky	IV	68.2293	7.18193	6.5726	0	1
98	Mizaojiao	IVF-CAAS	Jiangsu, China	II6C0445					C. annuum	11.08	Blocky	IV	58.9932	7.42161	5.9378	0	1
99	Thin flesh pepper	IVF-CAAS	Liaoning, China	II6C0355					C. annuum	6.25	Blocky	IV	57.4123	7.38553	5.57927	-	1
100	Dabaozi pepper	IVF-CAAS	Gansu, China	II6C0030					C. annuum	12.83	Blocky	IV	89.0413	6.30753	7.66747	11.6655	1
101	Dandong bell pepper	IVF-CAAS	Liaoning, China						C. annuum	5.04	Blocky	IV	55.57	6.30833	7.05	124.7	1
102	Fan County sweet pepper	IVF-CAAS	Henan, China	II6C0149					C. annuum	6.9	Blocky	IV	75.0016	9.85907	5.95927	34.3327	1
103	Zhuji large pepper	IVF-CAAS	Shandong, China	II6C1275					C. annuum	10.78	Blocky	IV	88.6758	9.19713	6.24307	0	1
												IV Avg	63.4121	7.36127	6.21179	27.2769
												Stdev	19.7695	1.32989	0.852008	44.8447
104	Unknown	NMSU	Peru		NMCA10500				C. annuum	8.89	Conical	V	30.83	10.0167	3.83333	328.341	1
105	Unknown	NMSU	Mexico		NMCA10220				C. annuum	9.87	Conical	V	-	9.45	6.2	0	1
106	Unknown	NMSU	Mexico		NMCA10217				C. annuum	8.47	Elongate	V	15.34	11.2	1.9	0	1
107	Numex R-Naky	NMSU	America						C. annuum	3.99	Elongate	V	46.1833	14.3083	3.66667	38.0627	1
108	Unknown	IVF-CAAS	Greece						C. annuum	9.72	Elongate	V	34.6713	14.8149	3.08753	44.6561	1
109	H3	INRAE	Ethiopia				PM0807		C. annuum	4.46	Elongate	V	13.2086	9.79167	2.36667	48.7575	1
110	Unknown	IVF-CAAS	America	II6C1824					C. annuum	9.29	Conical	V	11.7871	6.66671	2.3	470.564	1
111	SN1312	IVF-CAAS	China						C. annuum	5.18	Elongate	V	101.729	32.1	3.66667	0	1
112	Cattle-horn pepper	IVF-CAAS	Liaoning, China	II6C1541					C. annuum	9.23	Elongate	V	58.9698	16.7901	3.85133	69.9305	1
113	Xiaoyu thick long pepper	IVF-CAAS	Liaoning, China	II6C1154					C. annuum	9.33	Elongate	V	64.7282	15.4967	4.09347	8.25429	1
114	Spiral pepper	IVF-CAAS	Shaanxi, China						C. annuum	9.03	Elongate	V	31.425	23.975	2.35833	187.926	1
115	Very early small pepper	IVF-CAAS	Heilongjiang, China	II6C1537					C. annuum	10.72	Elongate	V	26.471	16.1876	2.40867	23.2299	1
116	Unknown	IVF-CAAS	Bulgaria	II6C0470					C. annuum	7.18	Elongate	V	40.3739	17.6046	2.693	7.58103	1
117	Long pepper	IVF-CAAS	Hebei, China	II6C0870					C. annuum	8.16	Elongate	V	33.8203	16.4807	2.64973	-	1
118	Qing County goat-horn pepper	IVF-CAAS	Hebei, China	II6C0407					C. annuum	7	Elongate	V	32.5106	17.8713	2.40173	456.263	1
119	Sumi pepper	IVF-CAAS	Liaoning, China	II6C0357					C. annuum	7.53	Elongate	V	33.453	19.9176	2.44513	12.7839	1
120	Ye County Sharp pepper	IVF-CAAS	Shandong, China	II6C0240					C. annuum	6.96	Elongate	V	33.2036	14.3851	3.0236	154.654	1
121	Unknown	IVF-CAAS	Guizhou, China	II6C1417					C. annuum	12.26	Elongate	V	33.663	14.2977	2.98853	125.463	1
122	Lydia	IVF-CAAS	Czech Republic	II6C2199					C. annuum	10.91	Conical	V	74.8872	14.1823	4.69917	0	1
123	Austria 7714	IVF-CAAS	Austria						C. annuum	5.01	Conical	V	53.9817	11.7583	4.2	0	1
124	Bell pepper	IVF-CAAS	Hebei, China	II6C0378					C. annuum	9.3	Round	V	25.3344	4.73433	4.6778	20.5823	1
125	Amy	IVF-CAAS	Czech Republic	II6C2200					C. annuum	8.94	Conical	V	93.2686	11.1561	5.53613	0	1
126	Unknown	IVF-CAAS	America	II6C1428					C. annuum	9.85	Elongate	V	42.9962	12.2335	3.2578	0	1
127	Hungarian Yellow Wax Pepper	IVF-CAAS	America						C. annuum	10.71	Elongate	V	41.6673	14.4279	3.317	32.4224	-
128	American chili	IVF-CAAS	America	II6C1278					C. annuum	9.2	Elongate	V	46.3699	14.0037	3.32701	-	0
129	182(2)yellow	IVF-CAAS	America	II6C1330					C. annuum	10.96	Elongate	V	30.3389	14.6363	2.78093	0	1
130	Bang Shang	IVF-CAAS	Thailand	II6C1548					C. annuum	8.24	Elongate	V	7.56033	9.03107	1.8668	553.285	1
131	PEPPER SHIPKA	IVF-CAAS	Bulgaria	II6C2203					C. annuum	9.11	Elongate	V	14.9632	8.89329	2.09193	270.194	1
132	Large red cherry	IVF-CAAS	America	II6C1366					C. annuum	7.92	Round	V	25.3698	3.52587	4.07573	283.147	0
133	Unknown	IVF-CAAS	Gansu, China	II6C2262					C. annuum	8.83	Round	V	26.607	4.32713	4.099	232.335	1
134	Cayenne Long Slim	IVF-CAAS	Netherlands	II6C2208					C. annuum	10.69	Elongate	V	29.226	21.8476	2.48853	47.6494	1
135	Numex Las Crues Cayenne	NMSU	America						C. annuum	9.3	Elongate	V	34.9813	19.3712	2.49183	180.655	1
136	Unknown	NMSU	Spain		NMCA10043				C. annuum	9.86	Round	V	27.38	4.05	4.75	0	1
137	Cayenne Long Slim	NMSU	Morocco		NMCA10876				C. annuum	10.29	Round	V	38.4	3.95	4.8	-	1
138	Numex Las Crues Cayenne	NMSU	Spain		NMCA10184				C. annuum	10.49	Conical	V	32.26	9.26667	4.01667	0	1
139	179	IVF-CAAS	America	II6C1373					C. annuum	10.04	Conical	V	29.0778	9.22072	3.18027	348.311	0
140	Unknown	IVF-CAAS	America	II6C1421					C. annuum	10.08	Conical	V	33.0573	10.6613	3.42345	89.0383	0
141	Unknown	IVF-CAAS	America	II6C1823					C. annuum	10.03	Conical	V	25.9975	6.91101	3.31893	-	0
142	181	IVF-CAAS	America	II6C1300					C. annuum	9.7	Conical	V	15.3804	4.10847	3.22947	0	1
143	Unknown	IVF-CAAS	America	II6C1426					C. annuum	10.26	Round	V	35.5405	3.8496	4.68733	0	-
144	167(round)	IVF-CAAS	America	II6C1363					C. annuum	8.16	Round	V	20.1276	3.34573	3.84993	0	1
145	Unknown	IVF-CAAS	America	II6C1890					C. annuum	7.83	Conical	V	23.8033	7.3846	3.02413	0	0
146	167(long)	IVF-CAAS	America	II6C1375					C. annuum	8.95	Conical	V	23.5939	5.56807	3.40813	-	1
147	Unknown	IVF-CAAS	America	II6C1921					C. annuum	6.96	Conical	V	34.6739	6.88993	4.28513	0	1
148	Sweet Banana	IVF-CAAS	America	II6C1335			PM1260		C. annuum	7.84	Conical	V	67.4343	10.1893	5.36793	0	1
149	138	IVF-CAAS	America	II6C1299					C. annuum	9.64	Conical	V	46.0985	8.413	4.64747	0	1
												V Avg	36.5054	11.7237	3.49637	98.3924
												Stdev	19.5202	6.09005	1.01615	150.492
150	Golden sweet pepper	IVF-CAAS	Xinjiang, China	II6C0065					C. annuum	5.79	Blocky	VI	79.7673	6.8746	6.94393	0	1
151	Zhudachang	IVF-CAAS	Xinjiang, China						C. annuum	4.79	Elongate	VI	39.165	13.35	3.93333	472.346	1
152	Yili large pepper	IVF-CAAS	Xinjiang, China	II6C1164					C. annuum	10.56	Elongate	VI	71.0633	12.0618	5.0804	38.3143	1
153	Paolazi	IVF-CAAS	Gansu, China	II6C1536					C. annuum	8.91	Elongate	VI	48.6123	14.3166	3.9936	-	1
154	Conical sweet pepper	IVF-CAAS	Jilin, China	II6C1954					C. annuum	9.53	Blocky	VI	63.0403	9.54627	5.54113	0	1
155	77013	IVF-CAAS	Shanghai, China						C. annuum	4.12	Blocky	VI	87.17	8.875	6.475	0	1
156	Cold-tolerant sweet pepper	IVF-CAAS	Heilongjiang, China	II6C2104					C. annuum	9.01	Blocky	VI	112.689	9.64807	7.00027	0	1
157	Sandaojin	IVF-CAAS	Heilongjiang, China	II6C0601					C. annuum	10.72	Blocky	VI	83.8798	8.7202	6.40693	0	1
158	Large pepper	IVF-CAAS	Hebei, China	II6C0384					C. annuum	6.07	Blocky	VI	80.3321	7.33687	6.26853	0	1
159	LIHAO 1 (75-7-3-1)	IVF-CAAS	Shanghai, China				PM1647		C. annuum	4.92	Blocky	VI	107.257	7.64167	7.42083	0	1
160	Unknown	IVF-CAAS	Hainan, China	II6C2245					C. annuum	11.83	Blocky	VI	107.063	7.138	6.9484	0	1
161	Thick flesh sweet pepper	IVF-CAAS	Heilongjiang, China	II6C2118					C. annuum	10.18	Blocky	VI	114.226	7.10733	7.10267	0	1
162	Spicy Sandaojin	IVF-CAAS	Liaoning, China	II6C1595					C. annuum	9.14	Blocky	VI	86.798	10.9427	5.92153	0	1
163	Bell pepper	IVF-CAAS	Tianjin, China	II6C0723					C. annuum	10.2	Blocky	VI	45.3986	6.88847	5.49713	0	1
164	Small dwarf	IVF-CAAS	Tianjin, China	II6C0177					C. annuum	7.4	Blocky	VI	81.6323	8.00153	6.5884	49.312	1
165	Champion pepper	IVF-CAAS	Heilongjiang, China	II6C1002					C. annuum	10.1	Blocky	VI	85.1867	10.4578	6.06047	0	1
166	83-163	IVF-CAAS	Japan						C. annuum	3.68	Blocky	VI	84.555	7.20833	7.375	0	1
167	Luanchuan bell pepper	IVF-CAAS	Henan, China	II6C0146					C. annuum	9.59	Blocky	VI	66.9467	9.86053	5.715	0	1
168	PETIT MARSEILLAIS	INRAE	France				PM1414		C. annuum	4.68	Elongate	VI	36.4906	9.55833	4.625	0	1
169	Yellow horn pepper	IVF-CAAS	China						C. annuum	8.33	Elongate	VI	136.771	23.5833	5.16667	0	1
170	9870MN	IVF-CAAS	Shanxi, China						C. annuum	4.98	Elongate	VI	110.661	21.0417	5.23333	0	1
171	9825M	IVF-CAAS	Shanxi, China						C. annuum	10.92	Blocky	VI	185.185	12.7333	8.06667	0	1
172	QUADRATO D'ASTI ROSSO 2	INRAE	Italy				PM0568		C. annuum	4.34	Blocky	VI	119.199	9.058	7.78855	0	1
173	PRIMOR	INRAE	Capo Verde				PM1457		C. annuum	9.61	Blocky	VI	80.855	6.85833	6.51667	0	1
174	CLARA	INRAE	Capo Verde				PM1456		C. annuum	10.46	Blocky	VI	137.36	8.78333	7.55417	0	1
175	RP38	INRAE	France						C. annuum	8.21	Blocky	VI	109.559	8.99167	6.64167	0	1
176	CHIKA 86 - 25 - 13 - 1 - 1	INRAE	France				PM1449		C. annuum	9.75	Blocky	VI	179.34	11.1917	7.90417	0	1
177	VANIA	INRAE	France				PM1409		C. annuum	8.67	Blocky	VI	250.915	14.4283	8.15167	0	1
178	Liraw(Bankim)	IVF-CAAS	India						C. annuum	9.55	Blocky	VI	143.718	7.2	8.89167	0	1
179	SAMKA	INRAE	France				PM1448		C. annuum	9.92	Blocky	VI	223.355	9.54167	9.76667	0	1
180	0516	IVF-CAAS	France						C. annuum	4.8	Blocky	VI	251.085	9.73833	9.95333	0	1	Solario subline
181	83-60	IVF-CAAS	France						C. annuum	8.13	Blocky	VI	156.554	8.29167	9.01667	0	1	80-33(N2) subline
182	83-58	IVF-CAAS	France						C. annuum	5.11	Blocky	VI	184.01	9.19167	8.38833	0	1	78-1(ME2-C2) subline
183	MILORD	INRAE	France				PM1408		C. annuum	4.81	Blocky	VI	128.678	8.8625	7.45417	0	1
184	Gadir	IVF-CAAS	France						C. annuum	4.57	Blocky	VI	219.493	11.5117	8.09333	0	1	Gadir subline
185	0601M	IVF-CAAS	Shanxi, China						C. annuum	5.2	Blocky	VI	210.175	11.6933	8.87833	0	1
186	Piment poivron	IVF-CAAS	England	II6C2210					C. annuum	10.62	Blocky	VI	127.796	8.1688	7.06047	0	1
187	TOM 4	INRAE	France				PM1445		C. annuum	4.87	Blocky	VI	44.21	6.38333	5.58333	0	1
188	KLS	IVF-CAAS	Beijing, China						C. annuum	4.85	Blocky	VI	158.993	8.45167	8.93167	0	1
189	Anna	IVF-CAAS	China						C. annuum	7.76	Blocky	VI	253.995	9.275	9.41667	0	1
190	Carolina Wonder	USDA	America						C. annuum	4.65	Blocky	VI	215.38	9.88	8.09	0	1
191	NOVI	INRAE	France						C. annuum	8.54	Blocky	VI	98.26	6.95833	7.11667	0	1
192	NOVI 3	INRAE	Netherlands				PM0799		C. annuum	3.93	Blocky	VI	134.118	8.27373	7.438	0	1
193	MAOR	IVF-CAAS	Israel	II6C1589			PM1863		C. annuum	9.2	Blocky	VI	124.665	8.79287	6.5872	0	1
												VI Avg	124.218	9.87314	7.01336	13.0226
												Stdev	60.4506	3.40237	1.4674	72.3282
194	8819	IVF-CAAS	Gansu, China						C. annuum	9.79	Slim	VII	14.8761	18.875	1.425	29.4723	1
195	Chicken feet chili	IVF-CAAS	Shaanxi, China	II6C0284					C. annuum	7.03	Slim	VII	7.75893	12.5143	1.3224	826.889	1
196	Eight-inch red chili	IVF-CAAS	Shaanxi, China	II6C0282					C. annuum	11.31	Slim	VII	11.1547	18.0093	1.27053	342.648	1
197	Small goat-horn pepper	IVF-CAAS	Liaoning, China	II6C0083					C. annuum	7.59	Conical	VII	6.8462	7.017	1.67247	64.8981	1
198	Zhangulu pepper	IVF-CAAS	Hebei, China	II6C0394					C. annuum	9.48	Elongate	VII	12.7603	12.8879	2.0788	-	1
199	Jize goat-horn pepper	IVF-CAAS	Hebei, China	II6C0731					C. annuum	10.51	Elongate	VII	12.8373	12.9017	1.46407	-	1
200	Jize pepper	IVF-CAAS	Hebei, China						C. annuum	4.48	Slim	VII	15.015	14.9333	1.70833	24.5266	1
201	Shifang pepper	IVF-CAAS	Shaanxi, China	II6C1856					C. annuum	9.07	Elongate	VII	10.5833	12.5773	1.53267	839.422	1
202	Pod pepper	IVF-CAAS	Sichuan, China	II6C0483					C. annuum	6.88	Short	VII	5.6916	7.32553	1.33033	2042.51	0
203	Small chili	IVF-CAAS	Jiangsu, China	II6C0304					C. annuum	9.24	Short	VII	4.36113	8.07393	1.155	2118.9	0
204	Yunling goat-horn pepper	IVF-CAAS	Yunnan, China	II6C2272					C. annuum	8.74	Elongate	VII	6.14613	8.5792	1.48133	363.381	1
205	Yan'an chicken mouth chili	IVF-CAAS	Shaanxi, China	II6C0893					C. annuum	7.53	Elongate	VII	7.76073	9.23367	1.59907	1578.63	1
206	Linxia slim chili	IVF-CAAS	Gansu, China	II6C1866					C. annuum	12.83	Elongate	VII	6.30867	11.8773	1.4448	94.9749	1
207	Unknown	IVF-CAAS	Thailand	II6C2221					C. annuum	10.52	Slim	VII	7.25167	11.8296	1.0922	582.707	1
208	Yao County slim Pepper	IVF-CAAS	Shaanxi, China	II6C0509					C. annuum	8.12	Slim	VII	7.06647	11.7496	0.9312	917.805	1
209	Xuchang chili	IVF-CAAS	Henan, China	II6C0160					C. annuum	6.33	Slim	VII	6.8612	10.9832	1.1066	1035.73	1
210	Cattle-horn pepper	IVF-CAAS	Guangxi, China	II6C1263					C. annuum	10.24	Elongate	VII	58.6139	12.2763	5.19253	2.23551	1
211	Large slim pepper	IVF-CAAS	Anhui, China	II6C1148					C. annuum	8.32	Slim	VII	8.27073	15.8197	1.06467	376.471	1
												VII Avg	11.6758	12.0813	1.604	702.575
												Stdev	12.1434	3.35471	0.937317	697.843
212	Long goat-horn pepper	IVF-CAAS	Anhui, China	II6C1048					C. annuum	9.08	Elongate	VIII	27.0596	14.0184	2.68973	-	1
213	Hua Jian	IVF-CAAS	Hubei, China	II6C1609					C. annuum	10.37	Elongate	VIII	28.3515	15.0686	2.38073	232.508	1
214	Yong'an dwarf large pepper	IVF-CAAS	Fujian, China	II6C0738					C. annuum	7.48	Elongate	VIII	27.7062	13.1721	2.55513	182.234	1
215	Naishi pepper	IVF-CAAS	Jilin, China						C. annuum	4.89	Conical	VIII	87.4333	13.675	4.675	704.451	1
216	Yanshan pepper	IVF-CAAS	Hebei, China	II6C0735					C. annuum	7.56	Elongate	VIII	21.8527	8.89247	3.00193	-	1
217	Cattle-horn pepper	IVF-CAAS	Hubei, China	II6C1139					C. annuum	10.01	Elongate	VIII	34.4487	14.7254	2.71713	511.25	1
218	Yuxia pepper	IVF-CAAS	Hubei, China	II6C1036					C. annuum	9.3	Elongate	VIII	33.1782	16.2193	3.0152	330.406	1
219	Xinjiang goat-horn pepper	IVF-CAAS	Xinjiang, China	II6C1347					C. annuum	10.26	Elongate	VIII	27.3853	14.8893	2.707	0	1
220	Liuyang large pepper	IVF-CAAS	Hunan, China	II6C0911					C. annuum	10.02	Conical	VIII	34.7111	7.52367	4.7454	-	1
221	Chenxi bell pepper	IVF-CAAS	Hunan, China	II6C1105					C. annuum	6.92	Elongate	VIII	15.1218	13.1839	2.09367	811.366	1
222	Bell Pao pepper	IVF-CAAS	Hunan, China	II6C0195					C. annuum	7.53	Conical	VIII	49.3161	9.61613	4.57087	0	1
223	Changyang chili	IVF-CAAS	Hubei, China	II6C1766					C. annuum	8.53	Slim	VIII	12.9453	14.8178	1.5368	278.999	1
224	Large chili	IVF-CAAS	Hubei, China	II6C1458					C. annuum	8.7	Conical	VIII	23.3957	8.53947	3.30007	-	1
225	Pepper	IVF-CAAS	Hubei, China	II6C1442					C. annuum	9.73	Elongate	VIII	28.2348	11.0055	3.09987	43.1986	1
226	Small chili	IVF-CAAS	Hubei, China	II6C1713					C. annuum	9.55	Elongate	VIII	42.8628	13.9178	3.92298	127.637	1
227	Local pepper	IVF-CAAS	Hubei, China	II6C1501					C. annuum	7.63	Elongate	VIII	31.6893	12.4279	3.15527	437.616	1
228	Short Cattle-horn pepper	IVF-CAAS	Hubei, China	II6C1436					C. annuum	9.2	Conical	VIII	36.186	11.6505	3.7348	73.3924	1
229	Small chili	IVF-CAAS	Hubei, China	II6C1377					C. annuum	7.29	Elongate	VIII	37.1402	12.394	3.6374	24.4505	1
230	Korea red chili	IVF-CAAS	North Korea	II6C1328					C. annuum	10.24	Elongate	VIII	21.2344	12.4707	2.7666	25.8546	1
231	Niuzhuang pepper	IVF-CAAS	Hubei, China	II6C1035					C. annuum	10.53	Elongate	VIII	12.4985	13.1655	1.62587	405.144	1
232	Cone chili	IVF-CAAS	Sichuan, China	II6C1467					C. annuum	8.68	Elongate	VIII	26.2361	11.326	2.78947	9.72261	1
233	Anqing early pepper	IVF-CAAS	Anhui, China	II6C1320					C. annuum	8.56	Elongate	VIII	29.9574	12.2002	2.90493	-	1
234	Qianzhou large pepper	IVF-CAAS	Hunan, China	II6C1083					C. annuum	9.47	Elongate	VIII	20.2134	13.2063	2.36907	432.393	1
235	Tongpaojiao	IVF-CAAS	Hunan, China	II6C1077					C. annuum	7.11	Conical	VIII	36.2591	7.9704	4.70873	-	1
236	Hanshou large pepper	IVF-CAAS	Hunan, China	II6C1574					C. annuum	9	Elongate	VIII	17.4148	7.9058	2.44827	1023.95	1
237	Chicken intestines chili	IVF-CAAS	Hunan, China	II6C1392					C. annuum	7.03	Slim	VIII	8.935	16.0194	1.28233	952.521	1
238	Slim pepper	IVF-CAAS	Shanxi, China	II6C0002					C. annuum	10.55	Elongate	VIII	14.6457	11.5635	2.34987	920.715	1
239	Dwarf early	IVF-CAAS	Liaoning, China	II6C0075					C. annuum	6.45	Elongate	VIII	13.7758	8.9494	2.56353	677.404	1
240	Xiaopengjiao	IVF-CAAS	Liaoning, China	II6C0347					C. annuum	8.81	Elongate	VIII	9.80035	11.2766	1.51387	1445.93	1
241	Zhangshugang early pepper	IVF-CAAS	Hunan, China	II6C0185					C. annuum	8.28	Elongate	VIII	17.1503	10.3326	2.4592	541.709	1
242	White pepper	IVF-CAAS	Shaanxi, China	II6C1149					C. annuum	9.4	Elongate	VIII	7.195	7.47713	1.7072	3234.02	0
243	Dwarf chili	IVF-CAAS	Hunan, China						C. annuum	4.83	Elongate	VIII	13.54	12.4333	2.19167	644.351	1
244	Small Cattle-horn	IVF-CAAS	Hubei, China	II6C1726					C. annuum	10.47	Elongate	VIII	16.6934	12.729	2.35067	239.528	1
245	Hongping pepper	IVF-CAAS	Hubei, China	II6C1504					C. annuum	8.27	Elongate	VIII	14.4569	10.4162	2.20715	-	1
246	Bell pepper	IVF-CAAS	Hubei, China	II6C1385					C. annuum	8.52	Elongate	VIII	21.5153	15.516	2.26103	251.034	1
247	Yongxing pepper	IVF-CAAS	Hunan, China	II6C0781					C. annuum	7.93	Elongate	VIII	12.4255	11.8322	1.9642	533.556	1
248	Xiabu goat-horn pepper	IVF-CAAS	Jiangxi, China	II6C0949					C. annuum	9.35	Elongate	VIII	19.3888	15.846	1.8766	901.346	1
249	Anhua pepper	IVF-CAAS	Hunan, China	II6C0762					C. annuum	11.93	Elongate	VIII	19.4145	14.9114	2.15733	344.222	1
250	Leiyang late pepper	IVF-CAAS	Anhui, China	II6C1317					C. annuum	11.56	Elongate	VIII	28.1937	14.4183	2.58947	617.682	1
251	Unknown	IVF-CAAS	China	II6C2134					C. annuum	9.98	Elongate	VIII	22.5469	13.9529	2.24393	246.797	1
252	Unknown	IVF-CAAS	Hainan, China	II6C2250					C. annuum	9.48	Elongate	VIII	33.3223	17.2313	2.54373	434.822	1
253	Yellow goat-horn	IVF-CAAS	Hubei, China	II6C1745					C. annuum	9.37	Elongate	VIII	29.7805	14.2434	2.5902	-	1
254	Short Cattle-horn	IVF-CAAS	Hubei, China	II6C1744					C. annuum	8.59	Elongate	VIII	26.4344	12.0549	2.8068	-	1
255	Local pepper	IVF-CAAS	Guangxi, China	II6C1265					C. annuum	11.49	Elongate	VIII	21.7447	13.6158	2.137	104.178	1
256	Changning pepper	IVF-CAAS	Hunan, China	II6C0925					C. annuum	9.73	Elongate	VIII	9.8678	12.1414	1.54227	768.75	1
257	Situjiao	IVF-CAAS	Jiangxi, China	II6C0768					C. annuum	10.31	Elongate	VIII	20.3615	8.65532	3.00253	1202.38	1
258	Leping medium seed pepper	IVF-CAAS	Jiangxi, China	II6C0435					C. annuum	11.69	Elongate	VIII	21.6111	11.4199	2.5212	1075.93	1
259	Naping slim pod pepper	IVF-CAAS	Fujian, China	II6C0684					C. annuum	6.83	Elongate	VIII	7.20433	7.32187	1.7126	2218.76	0
260	Yong'an yellow Zhitianjiao	IVF-CAAS	Fujian, China	II6C0496					C. annuum	9.44	Elongate	VIII	5.30513	6.23347	1.4795	4216.12	0
261	Yongfeng Teng Tian Jiao	IVF-CAAS	Jiangxi, China	II6C1103					C. annuum	7.16	Elongate	VIII	14.5399	14.6085	1.5626	-	1
262	Ninghua transparent Cattle-horn pepper	IVF-CAAS	Fujian, China	II6C1236					C. annuum	12.02	Elongate	VIII	11.7051	10.6601	1.69927	104.418	1
												VIII Avg	23.6154	12.1538	2.59741	666.604
												Stdev	13.413	2.67076	0.853356	843.234
263	Cattle-horn pepper	IVF-CAAS	Sichuan, China	II6C0536					C. annuum	6.56	Elongate	IX	13.4428	7.12893	2.73513	756.69	1
264	Juancheng slim pepper	IVF-CAAS	Shandong, China	II6C1063					C. annuum	7.21	Elongate	IX	15.3191	7.84307	2.6988	460.092	1
265	Datong chili	IVF-CAAS	Anhui, China	II6C0958					C. annuum	8.52	Elongate	IX	16.0505	9.47536	2.561	920.078	1
266	Olecranon early pepper	IVF-CAAS	Jiangsu, China	II6C0063					C. annuum	7.19	Elongate	IX	21.0561	8.86173	3.0562	1153.91	1
267	NANJING EARLY PEPPER	IVF-CAAS	Jiangsu, China				PM0776		C. annuum	5.13	Elongate	IX	13.1594	7.6	2.78333	33.7818	1
268	Early pepper	IVF-CAAS	Hubei, China	II6C1692					C. annuum	9.03	Elongate	IX	19.7209	7.84613	3.1704	798.438	1
269	Quanzhou Zhitianjiao	IVF-CAAS	Guangxi, China	II6C1390					C. annuum	7.7	Elongate	IX	8.05607	7.73809	1.6338	117.547	0
270	Chengdu Cattle-horn pepper	IVF-CAAS	Sichuan, China	II6C1884					C. annuum	9.43	Elongate	IX	77.6506	10.4583	5.1022	0	1
271	Local Haijiao	IVF-CAAS	Sichuan, China	II6C1531					C. annuum	9.67	Elongate	IX	11.0573	11.7541	1.643	909.629	1
272	Kilograms pepper	IVF-CAAS	Guizhou, China	II6C0657					C. annuum	9.48	Elongate	IX	8.09733	9.3584	1.64127	871.071	1
273	Xiaojintiao Haijiao	IVF-CAAS	Sichuan, China	II6C0116					C. annuum	7.27	Short	IX	4.35133	7.04627	1.57333	255.648	1
274	Erjintiao	IVF-CAAS	Sichuan, China	II6C0110					C. annuum	9.53	Elongate	IX	12.7556	8.60147	2.12493	451.47	-
275	Pod pepper	IVF-CAAS	Sichuan, China	II6C0106					C. annuum	8	Short	IX	3.4882	4.93987	1.2426	2305.54	0
276	Baoshan pepper	IVF-CAAS	Yunnan, China	II6C0101					C. annuum	8.27	Elongate	IX	43.1231	16.4048	2.77673	-	1
277	Erfutou	IVF-CAAS	Sichuan, China	II6C0539					C. annuum	9.46	Elongate	IX	20.0753	9.2916	2.78873	51.2118	1
278	Unknown	IVF-CAAS	Hunan, China	II6C1988					C. annuum	10.5	Slim	IX	9.21627	17.7489	1.19647	1009.73	1
279	Dry chili	IVF-CAAS	Hunan, China	II6C1979					C. annuum	9.13	Slim	IX	6.70857	16.9893	1.0026	598.424	1
280	Dahongpao	IVF-CAAS	Sichuan, China	II6C1678					C. annuum	9.06	Slim	IX	9.14633	14.7387	1.24901	956.757	1
281	Goat-horn pepper	IVF-CAAS	Hubei, China	II6C1222					C. annuum	10.81	Elongate	IX	10.1219	11.6027	1.62787	9.77319	1
282	Unknown	IVF-CAAS	Hunan, China	II6C2088					C. annuum	11.72	Short	IX	5.8222	9.07067	1.2816	1168.13	1
283	Duyun pepper	IVF-CAAS	Guizhou, China	II6C0289					C. annuum	6.69	Slim	IX	9.795	14.4668	1.1998	470.726	1
284	Caiguang pepper	IVF-CAAS	Hubei, China	II6C1020					C. annuum	11.79	Short	IX	3.60307	3.92847	1.28373	2402.13	0
285	Unknown	IVF-CAAS	Hunan, China	II6C1980					C. annuum	9.81	Slim	IX	6.97133	10.3147	1.16593	644.161	1
286	Jianhe pepper	IVF-CAAS	Guizhou, China	II6C1815					C. annuum	8.38	Elongate	IX	14.0197	11.6119	1.966	5.27082	1
287	Fuquan paotong pepper	IVF-CAAS	Guizhou, China	II6C0298					C. annuum	6.55	Conical	IX	18.9861	6.9144	3.12887	96.7804	1
288	Wengan Paotongjiao	IVF-CAAS	Guizhou, China	II6C1796					C. annuum	9.81	Elongate	IX	20.6943	14.617	2.29173	216.554	1
289	Baiyun chicken feet pepper	IVF-CAAS	Guizhou, China	II6C0668					C. annuum	9.44	Slim	IX	12.362	16.0887	1.3718	722.294	1
290	Early pepper	IVF-CAAS	Guizhou, China	II6C0625					C. annuum	5.03	Conical	IX	8.21387	7.51127	1.8538	33.3399	1
291	Guiding Cattle-horn pepper	IVF-CAAS	Guizhou, China	II6C0620					C. annuum	5.52	Elongate	IX	18.4785	10.2085	2.70407	317.244	1
292	Cattle-horn pepper	IVF-CAAS	Guizhou, China	II6C0619					C. annuum	5.52	Elongate	IX	11.4235	12.2336	1.70067	-	1
293	Baiyi flat pepper	IVF-CAAS	Guizhou, China	II6C0299					C. annuum	6.14	Elongate	IX	6.78213	11.9941	1.25227	547.36	1
294	Lianhuan pepper	IVF-CAAS	Guizhou, China	II6C1810					C. annuum	10.14	Conical	IX	4.0626	5.45433	1.57147	1031.98	1
295	Dewo white pepper	IVF-CAAS	Guizhou, China	II6C1538					C. annuum	9.97	Short	IX	3.6242	4.90407	1.28887	966.941	0
296	Wushe pepper	IVF-CAAS	Guizhou, China	II6C1370					C. annuum	9.42	Elongate	IX	4.98807	6.3714	1.526	18.6996	1
297	Local large chili	IVF-CAAS	Yunnan, China	II6C2283					C. annuum	9.1	Elongate	IX	6.5188	8.01107	1.6086	523.659	1
298	Unknown	IVF-CAAS	Yunnan, China	II6C2266					C. annuum	9.16	Elongate	IX	3.00207	4.5988	1.34	3462.48	1
299	Chongtianla	IVF-CAAS	Yunnan, China	II6C0460					C. annuum	7.45	Short	IX	3.31713	6.4658	0.9156	1502.75	0
300	Thick flesh chili	IVF-CAAS	Yunnan, China	II6C2294					C. annuum	10.88	Short	IX	6.48553	8.7064	1.18733	606.728	1
301	Qiubei chili	IVF-CAAS	Yunnan, China	II6C2295					C. annuum	9.51	Slim	IX	3.14773	10.7254	0.678467	1443.03	1
302	Caojiela	IVF-CAAS	Yunnan, China	II6C1306					C. annuum	7.65	Elongate	IX	8.9462	9.50633	1.66547	1287	0
303	Pod pepper	IVF-CAAS	Yunnan, China	II6C2278					C. annuum	8.97	Elongate	IX	5.92493	7.2858	1.40947	900.445	1
304	Large bend sweet pepper	IVF-CAAS	Beijing, China	II6C0442					C. annuum	9.09	Blocky	IX	107.646	9.21447	6.9126	0	1
305	Golden pepper	IVF-CAAS	Yunnan, China	II6C1302					C. annuum	9.57	Short	IX	4.8034	8.08453	1.16987	927.139	1
306	Xingyi large long pepper	IVF-CAAS	Guizhou, China	II6C0887					C. annuum	7.24	Slim	IX	14.3402	19.7999	1.34833	365.885	1
307	Iron angle chili	IVF-CAAS	Yunnan, China	II6C1830					C. annuum	9.4	Elongate	IX	14.9185	13.6323	1.61847	370.24	1
308	Yimen wrinkled pepper	IVF-CAAS	Yunnan, China	II6C1836					C. annuum	4.88	Elongate	IX	17.51	5.56667	3.59167	141.725	1
309	Luoye red pepper	IVF-CAAS	Yunnan, China	II6C1308					C. annuum	8.93	Elongate	IX	21.1285	13.6433	2.42247	16.4477	1
310	Bell pepper	IVF-CAAS	Yunnan, China	II6C1180					C. annuum	8.9	Conical	IX	67.0384	8.60613	5.65887	0	1
311	Unknown	IVF-CAAS	Tibet, China	II6C0516					C. annuum	7	Conical	IX	8.054	5.782	2.1792	690.721	1
												IX Avg	15.6164	9.81115	2.0796	692.333
												Stdev	19.5435	3.73206	1.21486	697.371
312	Yong'an small Zhitianjiao	IVF-CAAS	Fujian, China	II6C0950					C. frutescens	7.62	Short	/
313	Pod pepper	IVF-CAAS	Jiangxi, China	II6C1115					C. frutescens	10.81	Short	/
314	Damila	IVF-CAAS	Yunnan, China	II6C1406					C. frutescens	11.46	Short	/
315	Hua County Zhitianjiao	IVF-CAAS	Guangdong, China	II6C1873					C. frutescens	10.41	Short	/
316	Zhenfeng white pepper	IVF-CAAS	Guizhou, China	II6C2223					C. frutescens	8.84	Short	/
317	Nanlanghe Xiaomila	IVF-CAAS	Yunnan, China	II6C2267					C. frutescens	9.51	Short	/
318	Xiaomila	IVF-CAAS	Yunnan, China	II6C2282					C. frutescens	10.58	Short	/
319	SA 326	INRAE	America				PM0441		C. microcarpum	5.38	Waterdrop	/
320	SICUANI 1	INRAE	Peru				PM1547		C. pubescens	5.62	/	/
321	PI260429 (HDV42)	INRAE	Argentina				PM1265		C. chacoense	15.48	Waterdrop	/
322	ONGOY	INRAE	Peru				PM1788		C. pubescens	5.46	Blocky	/
323	Shuanla	IVF-CAAS	Yunnan, China						C. chinense	4.98	Conical	/
324	Unknown	AVRDC	America					PBC932	C. chinense	5	Dish	/
325	Xiaomila	IVF-CAAS	Yunnan, China						C. frutescens	10.76	Elongate	/
326	Pimenta Malagueta	IVF-CAAS	Brazil						C. frutescens	10.3	Short	/
327	Pimenta Cambuci （Chapeu de Bispo)	IVF-CAAS	Brazil						C. baccatum	9.1	Dish	/
328	Pimenta Salar	IVF-CAAS	Brazil						C. chinense	10.1	Conical	/
329	Unknown	USDA	America			PI 281435 01			C. chinense	10.55	Elongate	/
330	Unknown	USDA	America			PI 281435 01			C. chinense	8.78	Elongate	/
331	Unknown	USDA	America			PI 260513 01			C. chinense	8.03	Elongate	/
332	Unknown	USDA	America			PI 634826 01			C. frutescens	12.01	Short	/
333	Unknown	USDA	Brazil			PI 261310 01			C. baccatum	11.12	Elongate	/
334	Unknown	USDA	Peru			PI 215700 01			C. baccatum	10.16	Elongate	/
335	Unknown	USDA	Guatemala			PI 267729 01			C. baccatum	10.49	Elongate	/
336	Unknown	USDA	Peru			PI 215699 02			C. baccatum	11.29	Elongate	/
337	Trinidael scorpion	NMSU	America						C. chinense	9.28	Conical	/
338	PI152225	INRAE & USDA	America			PI 152225	PM1084		C. chinense	9.97	Conical	/
339	Hainan bell pepper	IVF-CAAS	Hainan, China						C. chinense	13.13	Blocky	/
340	Unknown	NMSU	Peru		NMCA10700				C. chinense	10.29	Elongate	/
341	Unknown	NMSU	Argentina		NMCA50009				C. chacoense	11.02	Waterdrop	/
342	Unknown	NMSU	Ecuador		NMCA50026				C. galapagoense	9.92	/	/
343	Unknown	NMSU	Paraguay		NMCA50030				C. flexuosum	11.69	Waterdrop	/
344	Unknown	NMSU	Bolivia		NMCA50053				C. minutiflorum	11.28	/	/
345	Unknown	NMSU	Peru		NMCA50064				C. rhomboideum	16.51	/	/
346	EX PIC8	INRAE	Nicaragua				PM1372		C. eximium	5.24	Waterdrop	/
347	LA PAZ	INRAE	Bolivia				PM1188		C. cardenasii	5.33	Waterdrop	/
*Note: In the column of "Origin of institute/genebank", IVF-CAAS, Institute of Vegetables and Flowers, Chinese Academy of Agricultural Sciences; INRAE, French National Research Institute for Agriculture, Food and Environment; NMSU, New Mexico State University; USDA, United States Department of Agriculture; AVRDC, Asian Vegetable Research and Development Center; WU, Wageningen University.
	# Note: In the column of "Origin of institute/genebank", IVF-CAAS, Institute of Vegetables and Flowers, Chinese Academy of Agricultural Sciences; INRAE, French National Research Institute for Agriculture, Food and Environment; NMSU, New Mexico State University; USDA, United States Department of Agriculture; AVRDC, Asian Vegetable Research and Development Center; WU, Wageningen University.

## Sheet: S2
Table S2. SNP loci verification by Kompetitive Allele-Specific PCR (KASP) .
Chromosome	Position	#Samples	Accuracy
Chr02	109815642	31	0.871
Chr02	141024318	39	0.9744
Chr02	141037679	29	0.8966
Chr02	141047796	29	0.9655
Chr02	143498938	35	0.9714
Chr02	149717784	23	1
Chr02	136859378	29	0.931
Chr02	143094156	25	1
Chr04	3765927	34	0.9706
Chr04	6725906	36	0.9444
Chr05	25468479	287	0.9756
Chr05	25472161	289	0.9862
Chr05	25472265	276	0.971
Chr05	25472626	260	0.9538
Chr05	25472832	282	0.9752
Chr05	25515132	288	0.9861
Chr07	59581113	31	0.9355
Chr07	70825771	38	0.9211
Chr07	81581631	42	0.9524
Chr07	121061858	39	0.9487
Chr07	206779789	30	1
Chr09	235801642	36	0.8889
Chr10	113485170	30	1
Chr10	63740615	35	0.9714
Chr10	71035006	26	1
Chr11	48393044	33	0.8788
Chr11	81093956	39	0.8974
Chr11	191462980	31	0.9355
Chr12	3513555	33	1
Chr12	202078797	25	1
Chr12	202079576	25	1
Chr12	202102660	38	0.9474
Chr12	202106902	42	0.9286
Chr12	202106902	37	0.973
Chr12	202107074	33	0.8485
Chr12	202107074	36	0.9722
Chr12	202108848	25	0.96
Chr12	202156422	36	0.9722
Chr12	202183987	39	0.9487
Chr12	202186709	36	0.8889
Chr12	202188319	39	0.9231
Chr12	202190115	32	0.9688
Chr12	202079576	33	1
Chr12	202082563	34	0.9118
Chr12	202083626	36	0.9444
Chr12	202093833	31	0.9355
Chr12	202202488	39	0.9231
Total	-	3051	0.9623

## Sheet: S3
Table S3. Positions of the SNPs and InDels identified in the pepper population*.
Variant	Genic						Intergenic	Total
	CDS		Intron		UTR
	NS/FS	S/NFS	splice	intron	5’UTR	3’UTR
SNP	55711	33346	471	274840	464143	386470	17157041	18372022
INDEL	2027	900	153	27197	39799	33621	699539	802875
*: Abbreviations: CDS: coding sequences; UTR: untranslated region; NS: nonsynonymous and S: synonymous mutations of SNPs; FS: frameshift and NFS: non-frameshift mutations of InDel.

## Sheet: S4
Table S4. Genomic regions under selection in transitions between different C. annuum groups, measured by ROD (reduction of diversity).
Groups (a vs. b)*	Chromosome	Start	Stop
II vs. I	Chr02	1	3500001
II vs. I	Chr04	80500002	100500001
II vs. I	Chr08	55500002	91500001
II vs. I	Chr09	127500002	185500001
II vs. I	Chr11	86500002	102500001
II vs. I	Chr11	105500002	106500001
III vs. II	Chr04	144500002	152500001
III vs. II	Chr05	166500002	169500001
III vs. II	Chr05	171500002	181500001
III vs. II	Chr05	188500002	205500001
III vs. II	Chr07	82500002	91500001
III vs. II	Chr07	129500002	180500001
III vs. II	Chr10	85500002	106500001
III vs. II	Chr12	88500002	104500001
III vs. II	Chr12	144500002	145500001
VII-IX vs. II	Chr04	127500002	138500001
VII-IX vs. II	Chr06	154500002	155500001
VII-IX vs. II	Chr06	159500002	164500001
VII-IX vs. II	Chr06	169500002	170500001
VII-IX vs. II	Chr07	82500002	90500001
VII-IX vs. II	Chr09	64500002	72500001
VII-IX vs. II	Chr09	124500002	128500001
VII-IX vs. II	Chr09	131500002	144500001
VII-IX vs. II	Chr11	143500002	150500001
VII-IX vs. II	Chr12	75500002	151500001
IV,VI vs. III	Chr07	130500002	158500001
IV,VI vs. III	Chr08	62500002	77500001
IV,VI vs. III	Chr08	93500002	96500001
IV,VI vs. III	Chr10	74500002	106500001
IV,VI vs. III	Chr11	61500002	105500001
IV,VI vs. III	Chr11	124500002	137500001
* Group a compared to its progenitor group b.

## Sheet: S5
Table S5. Significantly enriched GO (gene ontology) terms in genes under selection transitions between different C. annuum groups. Note: GO functions colored in red indicate important candidate gene sets involved in pepper fruit evolution.
Groups (a vs. b)*	GO terms	#under selection	#genome wide	P value	GO annotation
II vs. I	GO:0006890	4	13	1.967e-05	retrograde vesicle-mediated transport, Golgi to ER
II vs. I	GO:0000325	5	68	0.000776383	plant-type vacuole
II vs. I	GO:0008559	2	4	0.00139046	xenobiotic-transporting ATPase activity
II vs. I	GO:0005774	5	82	0.00170521	vacuolar membrane
II vs. I	GO:0004031	3	22	0.00182374	aldehyde oxidase activity
II vs. I	GO:0031304	2	6	0.00256186	intrinsic to mitochondrial inner membrane
II vs. I	GO:0005773	19	903	0.00257803	vacuole
II vs. I	GO:0016788	6	135	0.0028084	hydrolase activity, acting on ester bonds
II vs. I	GO:0006754	4	65	0.00476235	ATP biosynthetic process
II vs. I	GO:0006446	2	10	0.00588344	regulation of translational initiation
II vs. I	GO:0005525	8	269	0.00653321	GTP binding
II vs. I	GO:0003924	5	115	0.00674547	GTPase activity
II vs. I	GO:0006635	3	39	0.00804349	fatty acid beta-oxidation
II vs. I	GO:0010093	2	15	0.0117366	specification of floral organ identity
II vs. I	GO:0006120	2	16	0.0131186	mitochondrial electron transport, NADH to ubiquinone
II vs. I	GO:0006270	2	16	0.0131186	DNA replication initiation
II vs. I	GO:0046688	2	16	0.0131186	response to copper ion
II vs. I	GO:0006506	2	18	0.0160819	GPI anchor biosynthetic process
II vs. I	GO:0010332	2	20	0.0193016	response to gamma radiation
II vs. I	GO:0015914	2	21	0.0210042	phospholipid transport
II vs. I	GO:0007275	5	155	0.0211301	multicellular organismal development
II vs. I	GO:0042626	6	221	0.0252116	ATPase activity, coupled to transmembrane movement of substances
II vs. I	GO:0001522	2	25	0.0284007	pseudouridine synthesis
II vs. I	GO:0009982	2	25	0.0284007	pseudouridine synthase activity
II vs. I	GO:0006306	3	66	0.030234	DNA methylation
II vs. I	GO:0008094	2	27	0.0324325	DNA-dependent ATPase activity
II vs. I	GO:0004872	2	29	0.0366734	receptor activity
II vs. I	GO:0008536	2	30	0.0388691	Ran GTPase binding
II vs. I	GO:0015662	2	30	0.0388691	ATPase activity, coupled to transmembrane movement of ions, phosphorylative mechanism
II vs. I	GO:0006970	4	127	0.0402315	response to osmotic stress
II vs. I	GO:0003954	2	32	0.0434054	NADH dehydrogenase activity
III vs. II	GO:0004821	3	5	0.000147547	histidine-tRNA ligase activity
III vs. II	GO:0006427	3	5	0.000147547	histidyl-tRNA aminoacylation
III vs. II	GO:0008429	3	11	0.000900058	phosphatidylethanolamine binding
III vs. II	GO:0004485	2	4	0.00284943	methylcrotonoyl-CoA carboxylase activity
III vs. II	GO:0010178	2	4	0.00284943	IAA-amino acid conjugate hydrolase activity
III vs. II	GO:0010020	3	19	0.00350041	chloroplast fission
III vs. II	GO:0048573	5	67	0.0035366	photoperiodism, flowering
III vs. II	GO:0051752	2	5	0.00395192	phosphoglucan, water dikinase activity
III vs. II	GO:0005217	4	42	0.00398851	intracellular ligand-gated ion channel activity
III vs. II	GO:0006874	4	45	0.0050087	cellular calcium ion homeostasis
III vs. II	GO:0032876	2	6	0.00522005	negative regulation of DNA endoreduplication
III vs. II	GO:0030422	4	52	0.00803421	production of siRNA involved in RNA interference
III vs. II	GO:0006552	2	8	0.00823377	leucine catabolic process
III vs. II	GO:0019200	2	8	0.00823377	carbohydrate kinase activity
III vs. II	GO:0010304	2	10	0.0118528	PSII associated light-harvesting complex II catabolic process
III vs. II	GO:0009653	2	11	0.0138779	anatomical structure morphogenesis
III vs. II	GO:0050302	2	11	0.0138779	indole-3-acetaldehyde oxidase activity
III vs. II	GO:0005983	3	33	0.0140232	starch catabolic process
III vs. II	GO:0009707	3	33	0.0140232	chloroplast outer membrane
III vs. II	GO:0004565	3	34	0.0151031	beta-galactosidase activity
III vs. II	GO:0005719	2	12	0.0160408	nuclear euchromatin
III vs. II	GO:0004812	4	69	0.0197442	aminoacyl-tRNA ligase activity
III vs. II	GO:0007169	14	520	0.0214422	transmembrane receptor protein tyrosine kinase signaling pathway
III vs. II	GO:0007059	2	16	0.0259871	chromosome segregation
III vs. II	GO:0009850	2	16	0.0259871	auxin metabolic process
III vs. II	GO:0000145	3	44	0.0284259	exocyst
III vs. II	GO:0009851	2	17	0.028777	auxin biosynthetic process
III vs. II	GO:0006396	5	119	0.0314069	RNA processing
III vs. II	GO:0016791	3	46	0.0316415	phosphatase activity
III vs. II	GO:0004439	2	19	0.0346936	phosphatidylinositol-4,5-bisphosphate 5-phosphatase activity
III vs. II	GO:0046777	3	49	0.036805	protein amino acid autophosphorylation
III vs. II	GO:0050897	3	49	0.036805	cobalt ion binding
III vs. II	GO:0005982	2	20	0.0378129	starch metabolic process
III vs. II	GO:0016311	2	21	0.0410348	dephosphorylation
III vs. II	GO:0004031	2	22	0.0443556	aldehyde oxidase activity
III vs. II	GO:0010073	2	22	0.0443556	meristem maintenance
III vs. II	GO:0019953	2	22	0.0443556	sexual reproduction
VII-IX vs. II	GO:0042127	4	32	0.000591839	regulation of cell proliferation
VII-IX vs. II	GO:0010179	2	4	0.00166844	IAA-Ala conjugate hydrolase activity
VII-IX vs. II	GO:0004821	2	5	0.00231916	histidine-tRNA ligase activity
VII-IX vs. II	GO:0006427	2	5	0.00231916	histidyl-tRNA aminoacylation
VII-IX vs. II	GO:0051752	2	5	0.00231916	phosphoglucan, water dikinase activity
VII-IX vs. II	GO:0004402	3	23	0.00265584	histone acetyltransferase activity
VII-IX vs. II	GO:0010103	3	28	0.00441168	stomatal complex morphogenesis
VII-IX vs. II	GO:0019200	2	8	0.00486422	carbohydrate kinase activity
VII-IX vs. II	GO:0004737	2	11	0.00825298	pyruvate decarboxylase activity
VII-IX vs. II	GO:0030976	2	15	0.0139867	thiamin pyrophosphate binding
VII-IX vs. II	GO:0009897	3	45	0.0148323	external side of plasma membrane
VII-IX vs. II	GO:0009294	3	46	0.0156754	DNA mediated transformation
VII-IX vs. II	GO:0005982	2	20	0.0229315	starch metabolic process
VII-IX vs. II	GO:0000326	2	28	0.040822	protein storage vacuole
VII-IX vs. II	GO:0006623	2	28	0.040822	protein targeting to vacuole
VII-IX vs. II	GO:0009644	3	69	0.0423752	response to high light intensity
VII-IX vs. II	GO:0009570	12	618	0.0426924	chloroplast stroma
VII-IX vs. II	GO:0006334	3	70	0.0438491	nucleosome assembly
VII-IX vs. II	GO:0016831	2	30	0.0459	carboxy-lyase activity
IV,VI vs. III	GO:0006754	12	65	6.53152e-05	ATP biosynthetic process
IV,VI vs. III	GO:0008026	20	201	0.000814924	ATP-dependent helicase activity
IV,VI vs. III	GO:0004386	24	274	0.00136698	helicase activity
IV,VI vs. III	GO:0009695	7	40	0.0027832	jasmonic acid biosynthetic process
IV,VI vs. III	GO:0050826	4	12	0.00336449	response to freezing
IV,VI vs. III	GO:0015914	5	21	0.00358606	phospholipid transport
IV,VI vs. III	GO:0006808	4	13	0.0042588	regulation of nitrogen utilization
IV,VI vs. III	GO:0009590	3	6	0.00470013	detection of gravity
IV,VI vs. III	GO:0009062	3	7	0.006512	fatty acid catabolic process
IV,VI vs. III	GO:0044262	3	7	0.006512	cellular carbohydrate metabolic process
IV,VI vs. III	GO:0010072	5	25	0.00678896	primary shoot apical meristem specification
IV,VI vs. III	GO:0005524	152	2875	0.00736143	ATP binding
IV,VI vs. III	GO:0016165	5	26	0.00782707	lipoxygenase activity
IV,VI vs. III	GO:0007169	35	520	0.00826635	transmembrane receptor protein tyrosine kinase signaling pathway
IV,VI vs. III	GO:0004349	2	2	0.00939388	glutamate 5-kinase activity
IV,VI vs. III	GO:0004350	2	2	0.00939388	glutamate-5-semialdehyde dehydrogenase activity
IV,VI vs. III	GO:0007112	2	2	0.00939388	male meiosis cytokinesis
IV,VI vs. III	GO:0010245	2	2	0.00939388	radial microtubular system formation
IV,VI vs. III	GO:0046912	2	2	0.00939388	transferase activity, transferring acyl groups, acyl groups converted into alkyl on transfer
IV,VI vs. III	GO:0015662	5	30	0.0130793	ATPase activity, coupled to transmembrane movement of ions, phosphorylative mechanism
IV,VI vs. III	GO:0000808	3	10	0.014164	origin recognition complex
IV,VI vs. III	GO:0004016	3	10	0.014164	adenylate cyclase activity
IV,VI vs. III	GO:0006171	3	10	0.014164	cAMP biosynthetic process
IV,VI vs. III	GO:0006446	3	10	0.014164	regulation of translational initiation
IV,VI vs. III	GO:0017150	3	10	0.014164	tRNA dihydrouridine synthase activity
IV,VI vs. III	GO:0008033	6	43	0.0141809	tRNA processing
IV,VI vs. III	GO:0008792	2	3	0.0152345	arginine decarboxylase activity
IV,VI vs. III	GO:0009915	2	3	0.0152345	phloem loading
IV,VI vs. III	GO:0050284	2	3	0.0152345	sinapate 1-glucosyltransferase activity
IV,VI vs. III	GO:0051750	2	3	0.0152345	delta3,5-delta2,4-dienoyl-CoA isomerase activity
IV,VI vs. III	GO:0008152	67	1179	0.0155989	metabolic process
IV,VI vs. III	GO:0019252	3	12	0.0212085	starch biosynthetic process
IV,VI vs. III	GO:0032260	2	4	0.0222382	response to jasmonic acid stimulus during jasmonic acid and ethylene-dependent systemic resistance
IV,VI vs. III	GO:0045039	2	4	0.0222382	protein import into mitochondrial inner membrane
IV,VI vs. III	GO:0005507	19	265	0.0249371	copper ion binding
IV,VI vs. III	GO:0010287	7	66	0.029031	plastoglobule
IV,VI vs. III	GO:0003885	2	5	0.0303005	D-arabinono-1,4-lactone oxidase activity
IV,VI vs. III	GO:0004300	2	5	0.0303005	enoyl-CoA hydratase activity
IV,VI vs. III	GO:0008506	2	5	0.0303005	sucrose:hydrogen symporter activity
IV,VI vs. III	GO:0008515	2	5	0.0303005	sucrose transmembrane transporter activity
IV,VI vs. III	GO:0033903	2	5	0.0303005	endo-1,3(4)-beta-glucanase activity
IV,VI vs. III	GO:0003755	7	67	0.0309748	peptidyl-prolyl cis-trans isomerase activity
IV,VI vs. III	GO:0008080	6	53	0.0325055	N-acetyltransferase activity
IV,VI vs. III	GO:0046910	6	53	0.0325055	pectinesterase inhibitor activity
IV,VI vs. III	GO:0008233	7	69	0.0351195	peptidase activity
IV,VI vs. III	GO:0003713	5	40	0.0353234	transcription coactivator activity
IV,VI vs. III	GO:0009409	22	333	0.0356058	response to cold
IV,VI vs. III	GO:0009089	4	27	0.0358967	lysine biosynthetic process via diaminopimelate
IV,VI vs. III	GO:0007018	8	85	0.0360501	microtubule-based movement
IV,VI vs. III	GO:0004332	2	6	0.0393236	fructose-bisphosphate aldolase activity
IV,VI vs. III	GO:0004412	2	6	0.0393236	homoserine dehydrogenase activity
IV,VI vs. III	GO:0031304	2	6	0.0393236	intrinsic to mitochondrial inner membrane
IV,VI vs. III	GO:0009737	22	340	0.0425234	response to abscisic acid stimulus
IV,VI vs. III	GO:0003676	64	1190	0.0429645	nucleic acid binding
IV,VI vs. III	GO:0000175	3	17	0.0457246	3'-5'-exoribonuclease activity
IV,VI vs. III	GO:0031048	3	17	0.0457246	chromatin silencing by small RNA
IV,VI vs. III	GO:0008113	2	7	0.049216	peptide-methionine-(S)-S-oxide reductase activity
IV,VI vs. III	GO:0009098	2	7	0.049216	leucine biosynthetic process
IV,VI vs. III	GO:0009687	2	7	0.049216	abscisic acid metabolic process
IV,VI vs. III	GO:0009835	2	7	0.049216	ripening
IV,VI vs. III	GO:0046835	2	7	0.049216	carbohydrate phosphorylation
* Group a compared to its progenitor group b.

## Sheet: S6
Table S6. Gene units under selection in different pepper groups compared to their progenitor groups in the pepper population.
Gene	ROD	πa	πb	#SNPs	Gene symbol/annotation	Groups
						(a vs. b)*
Capana04g002188	0.92	0.03	0.44	62	AP2-A, sepal regulation	II vs. I
Capana02g000700	0.98	0.01	0.48	78	AP2-A, sepal regulation	III vs. II
Capana05g000060	1	0	0.3	15	SUN, SlIQD12, fruit shape regulation	IV, VI vs. III
Capana07g001005	1	0	0.47	33	agamous family gene, flower development related	IV, VI vs. III
Capana10g000984	0.96	0.02	0.43	73	cyclin-dependent protein kinase	IV, VI vs. III
Capana10g001014	0.96	0.02	0.44	35	cyclin-dependent protein kinase	IV, VI vs. III
Capana03g002426	0.72	0.1	0.35	52	mitotic phase inducer phosphatase-like protein	IV, VI vs. III
Capana09g001401	0.79	0.06	0.31	191	glycine-rich cell wall structural protein-like	IV, VI vs. III
* Group a compared to its progenitor group b.
